# Supplementary material for: Impact of dietary supplementation with olive and thyme phenols on alpha-tocopherol concentration in the muscle and liver of adult Wistar rats
Source: Royal Society of Chemistry journal article supplement (doi:10.1039/c7fo01533j), 2018-01-01
Supplement: c7fo01533j2.pdf [file c7fo01533j2.pdf]

## Supplementary Material

**Table S1.** Diet characteristics of the experiment.

| Group                                   | Diet characteristics                                                                                      | Dose administered through feedstuff                                                                  |
|-----------------------------------------|-----------------------------------------------------------------------------------------------------------|------------------------------------------------------------------------------------------------------|
| 1. Control                              | Feedstuff as is (not enriched)                                                                            | Not applied                                                                                          |
| 2. Oleuropein (OLE)                     | Feedstuff enriched with oleuropein standard (Extrasynthese, Genay, France)                                | 5 mg oleuropein/kg weight rat                                                                        |
| 3. Secoiridoids (SEC)                   | Feedstuff enriched with secoiridoids extracted from olive cake*                                           | 5 mg 3,4-DHPEA-EDA/kg weight rat                                                                     |
| 4. Hydroxytyrosol (HT)                  | Feedstuff enriched with hydroxytyrosol standard (Seprox Biotech, Madrid, Spain)                           | 5 mg hydroxytyrosol/kg weight rat                                                                    |
| 5. Secoiridoids + Thyme phenols (SEC+T) | Feedstuff enriched with a combination of secoiridoids extracted from olive cake* and phenols from thyme** | 2.5 mg 3,4-DHPEA-EDA/kg weight rat + 2.5 mg thyme phenols (rosmarinic acid + thymusin)/kg weight rat |
| 6. Thyme phenols (T)                    | Feedstuff which contains thyme**                                                                          | 5 mg of thyme phenols (rosmarinic acid + thymusin)/kg rat                                            |

\* Dose prepared based on the main phenolic compound in the olive cake extract: 3,4-DHPEA-EDA (dialdehydic form of elenolic acid linked with hydroxytyrosol).

\*\* Dose prepared based on the concentration of the main phenolic compounds in the thyme extract: rosmarinic acid and the flavonoid, thymusin.
